# Supplementary material
Source: Elsevier journal article supplement (https://www.sciencedirect.com/science/article/pii/S0033833816000059)
Supplement: mmc1 [file S0033833816000059:mmc1.pdf]

Tabla 1 online. Secuencias para estudio por RM de patología degenerativa de raquis lumbar

| Secuencia       | TR/TE (ms) | FOV<br>(mm) | Matriz    | NEX | Grosor<br>(mm) | Comentarios                                          | Longitud del<br>tren de ecos |
|-----------------|------------|-------------|-----------|-----|----------------|------------------------------------------------------|------------------------------|
| Localizador     | 30/10      | 400         | 128x128   | 1   | 10             | Ángulo 50°                                           |                              |
| Gradient        |            |             |           |     |                |                                                      |                              |
| Echo            |            |             |           |     |                |                                                      |                              |
| Sagital T1      | 550/ 20    | 270         | 156-307 × | 2   | 4              | 0,4-1,3 mm                                           |                              |
| Spin-echo       |            |             | 192-512   |     |                | intervalo                                            |                              |
| Sagital T2      | 3.300/102  | 270         | 156-307 × | 2   | 4              | 0,4-1,3 mm                                           | 12                           |
| Turbo spin-echo |            |             | 192-512   |     |                | interval.<br>Saturación<br>grasa                     |                              |
| Axial T2        | 3.040/103  | 180         | 224-190 × | 3   | 4              | 0,4 mm                                               | 5                            |
| Turbo spin-echo |            |             | 256-512   |     |                | intervalo.<br>Paralelo a<br>los espacios<br>discales |                              |
| Sagital         | 4000/60    | 27          | 121x256   | 5   | 3              |                                                      |                              |
| STIR            | TI=150     |             |           |     |                |                                                      |                              |

TR: tiempo de repetición; TE: tiempo de excitación; FOV: campo de visión; TI: tiempo de inversión; NEX: número de excitaciones.

Tabla 2. Tratamientos más comúnmente prescritos para el tratamiento del dolor lumbar.

| Dolor o exacerbación aguda (< 14 días):<br><br>Eficacia y efectividad                                                                                                                                                                                                                                                                                                   |                                                                                                                                                                                                                                                                                                                                                                  | Dolor o exacerbación subaguda (14-90 días) o crónica (> 90 días):<br><br>Eficacia y efectividad:                                                                                                                                                                                                                                                                                                                                                           |                                                                                                                                                                                                                                                                                                                                                                                                                                                          |
|-------------------------------------------------------------------------------------------------------------------------------------------------------------------------------------------------------------------------------------------------------------------------------------------------------------------------------------------------------------------------|------------------------------------------------------------------------------------------------------------------------------------------------------------------------------------------------------------------------------------------------------------------------------------------------------------------------------------------------------------------|------------------------------------------------------------------------------------------------------------------------------------------------------------------------------------------------------------------------------------------------------------------------------------------------------------------------------------------------------------------------------------------------------------------------------------------------------------|----------------------------------------------------------------------------------------------------------------------------------------------------------------------------------------------------------------------------------------------------------------------------------------------------------------------------------------------------------------------------------------------------------------------------------------------------------|
| Comprobadas                                                                                                                                                                                                                                                                                                                                                             | Desconocida/s o descartada/s                                                                                                                                                                                                                                                                                                                                     | Comprobadas                                                                                                                                                                                                                                                                                                                                                                                                                                                | Desconocida/s o descartada/s                                                                                                                                                                                                                                                                                                                                                                                                                             |
| <ul style="list-style-type: none"> <li>• Antiinflamatorios no esteroideos</li> <li>• Calor local</li> <li>• Cirugía descompresiva (en casos de síndrome de la cola de caballo)</li> <li>• Evitar –o reducir al máximo- el reposo en cama</li> <li>• Mantener el mayor grado posible de actividad física</li> <li>• Opiáceos</li> <li>• Relajantes musculares</li> </ul> | <ul style="list-style-type: none"> <li>• Antiepilépticos</li> <li>• Acupuntura (efectiva pero no eficaz)<sup>a</sup></li> <li>• Cirugía (en cualquier caso que no sea el síndrome de la cola de caballo)</li> <li>• Corticoides sistémicos</li> <li>• Corrientes interferenciales</li> <li>• Ejercicio</li> <li>• Estimulación eléctrica transcutánea</li> </ul> | <ul style="list-style-type: none"> <li>• Antidepresivos tricíclicos</li> <li>• Antiepilépticos</li> <li>• Antiinflamatorios no esteroideos</li> <li>• Capsicina tópica</li> <li>• Cirugía descompresiva en casos seleccionados<sup>b</sup></li> <li>• Educación sanitaria (“manejo activo”)</li> <li>• Ejercicio</li> <li>• Evitar –o reducir al máximo- el reposo en cama</li> <li>• Infiltración epidural<sup>c</sup></li> <li>• Intervención</li> </ul> | <ul style="list-style-type: none"> <li>• Acupuntura (efectiva pero no eficaz)<sup>a</sup></li> <li>• Bloqueos de la rama medial (en casos en los que se asume que le dolor es de origen facetario)</li> <li>• Corrientes interferenciales</li> <li>• Corsé</li> <li>• Corticoides sistémicos</li> <li>• Denervación por radiofrecuencia</li> <li>• Educación sanitaria (higiene postural)</li> <li>• Estimulación eléctrica percutánea (PENS)</li> </ul> |

|  |                                                                                                                                                                                                                                                    |                                                                                                                                                                                                                                                                                       |                                                                                                                                                                                                                                                                                                                                                                                                                                                                                         |
|--|----------------------------------------------------------------------------------------------------------------------------------------------------------------------------------------------------------------------------------------------------|---------------------------------------------------------------------------------------------------------------------------------------------------------------------------------------------------------------------------------------------------------------------------------------|-----------------------------------------------------------------------------------------------------------------------------------------------------------------------------------------------------------------------------------------------------------------------------------------------------------------------------------------------------------------------------------------------------------------------------------------------------------------------------------------|
|  | <p>(TENS)</p> <ul style="list-style-type: none"><li>• Frío local</li><li>• Manipulación vertebral</li><li>• Masaje</li><li>• Onda corta-diatermia</li><li>• Paracetamol</li><li>• Punción seca</li><li>• Tracción</li><li>• Ultrasonidos</li></ul> | <p>neurorreflejoterápica</p> <ul style="list-style-type: none"><li>• Mantener el mayor grado posible de actividad física</li><li>• Masaje</li><li>• Opiáceos</li><li>• Punción seca</li><li>• Rehabilitación multidisciplinaria intensa</li><li>• Tratamientos psicológicos</li></ul> | <ul style="list-style-type: none"><li>• IDET (termocoagulación intradiscal)</li><li>• Infiltraciones<sup>c</sup> (musculares, intradiscales, en puntos gatillo, sacroilíacas, facetarias o epidurales –en casos distintos a dolor radicular por hernia discal sintomática)</li><li>• Manipulación vertebral</li><li>• Onda corta - diatermia</li><li>• Proloterapia</li><li>• Relajantes musculares</li><li>• Rizolisis<sup>d</sup></li><li>• Tracción</li><li>• Ultrasonidos</li></ul> |
|--|----------------------------------------------------------------------------------------------------------------------------------------------------------------------------------------------------------------------------------------------------|---------------------------------------------------------------------------------------------------------------------------------------------------------------------------------------------------------------------------------------------------------------------------------------|-----------------------------------------------------------------------------------------------------------------------------------------------------------------------------------------------------------------------------------------------------------------------------------------------------------------------------------------------------------------------------------------------------------------------------------------------------------------------------------------|

a: La acupuntura ha demostrado consistentemente obtener mejores resultados que no hacer nada (por ejemplo, lista de espera), pero no que la acupuntura placebo (definida como insertar agujas en cualquier punto –de acupuntura o no-, o presionar con un

mondadientes). La comparación con otros tratamientos (como masaje o tratamientos físicos) ha dado lugar a resultados inconsistentes.

- b: La quimionucleolisis y la discectomía/microdiscectomía (eventualmente con foraminotomía) han demostrado ser efectivas específicamente en casos de hernia discal sintomática en la que el dolor irradiado persiste 6 o más semanas y es intenso (al año, 2 y 4 años, los pacientes no operados están tan bien como los operados, y el dolor lumbar evoluciona igual en ambos grupos, pero el dolor irradiado desaparece más rápidamente en los operados). La colocación de un dispositivo interespinoso y la laminectomía (con artrodesis sólo en los casos en los que la estenosis se debe a espondilolistesis), han demostrado ser efectivas para el dolor radicular debido a estenosis espinal cuando el dolor se ha mantenido  $\geq 3$ -6 meses. En los casos en los que no hay dolor radicular (sino sólo dolor lumbar), y en los que el dolor se atribuye a degeneración discal (aunque esta se observa por igual en sujetos sanos), la artrodesis no ha demostrado ser más efectiva que el ejercicio intenso; por eso, las guías de práctica clínica basadas en el conocimiento científico no la recomiendan en esos casos.
- c: Las infiltraciones epidurales sólo han demostrado tener efecto (de intensidad moderada y duración breve) específicamente en casos de dolor radicular debido a hernia discal sintomática. No han demostrado tener ningún efecto positivo en otras indicaciones (estenosis espinal sintomática, dolor lumbar sin dolor radicular, degeneración facetaria, etc.).
- d: La rizólisis ha demostrado tener un efecto positivo durante varios meses en casos de dolor cervical crónico atribuido a lesión de la articulación zigoapofisaria, en los que los casos en los que se plantea responden positivamente a dos infiltraciones locales y no a una infiltración placebo. No ha demostrado ser eficaz en casos de dolor lumbar.
